# Supplementary material for: Basigin deficiency prevents anaplerosis and ameliorates insulin resistance and hepatosteatosis
Source: PubMed Central journal article supplement (PMC8564892; doi:10.1172/jci.insight.142464), 2021-10-22

## Supplemental Figure legends

**Supplemental Figure 1.** Expression of MCT1 and BSG in the liver and kidneys.

(A) Immunofluorescence staining for BSG, MCT1 and MCT4 in skeletal muscles from *Bsg<sup>+/+</sup>* and *Bsg<sup>-/-</sup>* mice. Scale bar, 100  $\mu$ m. (B) BSG expression in mitochondria or cytosol of isolated hepatocytes as determined by western blotting. (C, D) Expression of the *Slc16a1* gene, which encodes MCT1, in the liver (C) and kidneys (D) of *Bsg<sup>+/+</sup>* or *Bsg<sup>-/-</sup>* mice (n=6-8/genotype). mRNA levels were normalized to those encoding the housekeeping protein  $\beta$ -actin. White columns and circles, *Bsg<sup>+/+</sup>* mice; gray columns and black circles, *Bsg<sup>-/-</sup>* mice. Data are presented as means  $\pm$  SEM. Scatter plots display the data for individual mice. N.S., not significant ( $p \geq 0.05$ ), for the comparison of *Bsg<sup>+/+</sup>* and *Bsg<sup>-/-</sup>* at the indicated time point (two-tailed unpaired Student's *t* test). (E) Time course of extracellular lactate levels in C2C12 cells transfected with control or MCT1 siRNA and cultured in medium supplemented with 25 mM D-glucose. n=3 for independent experiments. White circles, control siRNA; black circles, MCT1 siRNA. For all relevant panels, data are presented as means  $\pm$  SEM. \*\* $p < 0.01$ , \*\*\* $p < 0.005$ , for the comparison of siControl and siMCT1 at the indicated time point. (F) Time course of extracellular lactate values in the absence or presence of 100 nM AZD3965 (an inhibitor of MCT1 activity). White circles, DMSO; black circles, AZD3965.

**Supplemental Figure 2.** *Bsg* deficiency leads to the depletion of TCA cycle intermediates in the kidneys.

(A) Static metabolome analysis was performed for TCA cycle intermediates in renal cortex in *Bsg<sup>+/+</sup>* or *Bsg<sup>-/-</sup>* animals subjected to fasting conditions (n=7-8/genotype). White columns and circles, *Bsg<sup>+/+</sup>* mice; gray columns and black circles, *Bsg<sup>-/-</sup>* mice. Data are presented as means  $\pm$  SEM. Scatter plots display the data for individual mice. N.S., not significant ( $p \geq 0.05$ ), for

the comparison of *Bsg*<sup>+/+</sup> and *Bsg*<sup>-/-</sup> at the indicated time point (two-tailed unpaired Student's *t* test).

**Supplemental Figure 3.** *Bsg* deficiency impairs gluconeogenesis in vivo.

(A) Blood glucose levels of *Bsg*<sup>+/+</sup> and *Bsg*<sup>-/-</sup> mice under feeding conditions (n=12/genotype).

White columns and circles, *Bsg*<sup>+/+</sup> mice; gray columns and black circles, *Bsg*<sup>-/-</sup> mice. Data are presented as means ± SEM. Scatter plots display the data for individual mice. (B, C)

Expression of transcripts encoding proteins involved in gluconeogenesis, including pyruvate carboxylase (PCX), phosphoenolpyruvate carboxykinase (PCK)-1, and glucose-6-phosphatase (G6PC), in the liver (B) and kidneys (C) of *Bsg*<sup>+/+</sup> or *Bsg*<sup>-/-</sup> mice under feeding and fasting conditions (n=6/condition). mRNA levels were normalized to those encoding the housekeeping protein β-actin.

**Supplemental Figure 4.** Static metabolome analysis in vivo.

Static metabolome analysis for amino acids in renal cortex (A), sera (B), and ureagenesis-related metabolites in the liver (C) from *Bsg*<sup>+/+</sup> or *Bsg*<sup>-/-</sup> mice under fasting conditions (n=7-8/genotype and condition combination). White columns and circles, *Bsg*<sup>+/+</sup> mice; gray columns and black circles, *Bsg*<sup>-/-</sup> mice. Data are presented as means ± SEM. Scatter plots display the data for individual mice.

**Supplemental Figure 5.** Improvement of diet-induced insulin resistance in *Bsg*-deficient mice.

(A) Body weights of *Bsg*<sup>+/+</sup> and *Bsg*<sup>-/-</sup> mice maintained on CD or HFD for 16 weeks. White circles, HFD-fed *Bsg*<sup>+/+</sup> mice; black circles, HFD-fed *Bsg*<sup>-/-</sup> mice; white squares, CD-fed *Bsg*<sup>+/+</sup> mice; black squares, CD-fed *Bsg*<sup>-/-</sup> mice (n=10-11/genotype and diet combination). (B) Total

energy intake of *Bsg<sup>+/+</sup>* and *Bsg<sup>-/-</sup>* animals over the 16-week study period (n=10-11/genotype and diet combination). White columns, *Bsg<sup>+/+</sup>* mice; gray columns, *Bsg<sup>-/-</sup>* mice. **(C, D)** Blood glucose excursions and the AUC scores in *Bsg<sup>+/+</sup>* and *Bsg<sup>-/-</sup>* mice (maintained on CD or HFD for 16 weeks) during **(C)** lactate tolerance tests (n=6-12) and **(D)** pyruvate tolerance tests (n=8-12). **(E)** Serum triglycerides levels of *Bsg<sup>+/+</sup>* and *Bsg<sup>-/-</sup>* mice at 16 weeks. n=5-6/genotype and diet combination. **(F)** 3-hydroxybutyrate contents in the liver and kidneys of *Bsg<sup>+/+</sup>* and *Bsg<sup>-/-</sup>* mice maintained on CD or HFD for 16 weeks (n=5-6). **(G)** Twenty-four-hour respiratory quotient (PER;  $VO_2/VCO_2$ ) and volume of oxygen consumption ( $VO_2$ ) as measured by indirect calorimetry with *ad libitum* access to HFD and water. n=6. **(H)** Liver levels of the transcript encoding NF-E2-related factor (NRF)-2 in HFD-fed *Bsg<sup>+/+</sup>* and *Bsg<sup>-/-</sup>* mice (n=5-6/genotype). For all panels, data are presented as means  $\pm$  SEM. \*p<0.05, \*\*p<0.01, \*\*\*\*p<0.0001, N.S., not significant (p  $\geq$  0.05), for the comparison of *Bsg<sup>+/+</sup>* and *Bsg<sup>-/-</sup>* at the indicated time point (two-tailed unpaired Student's *t* test).

# Supplemental Figure 1

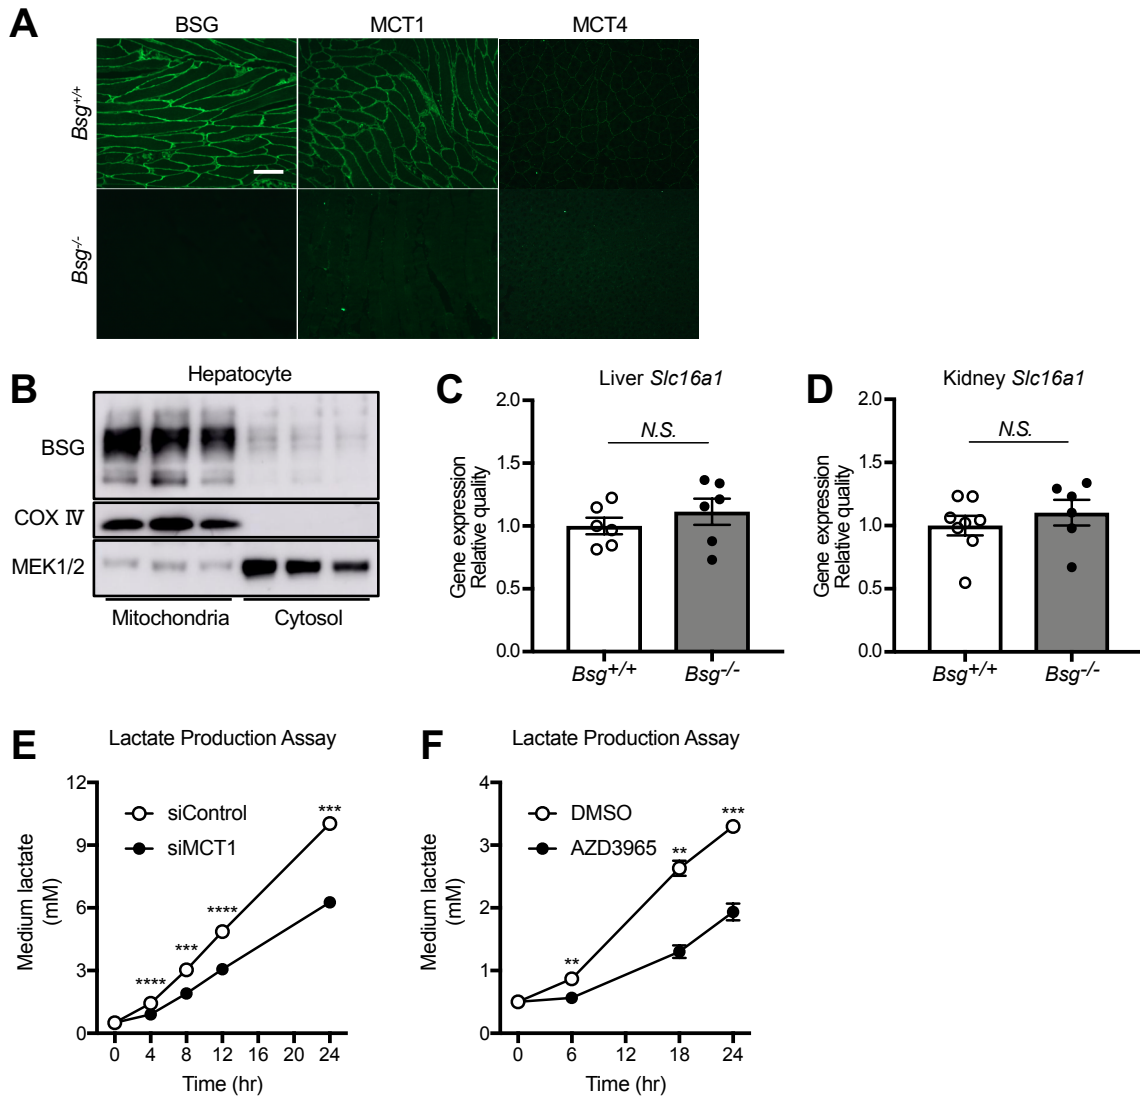

## Supplemental Figure 2

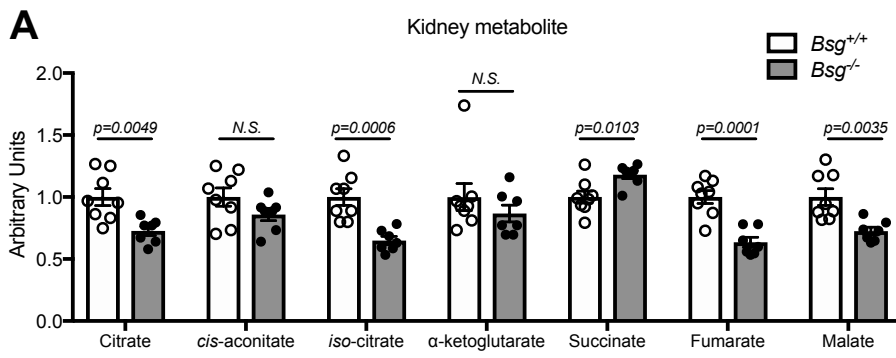

# Supplemental Figure 3

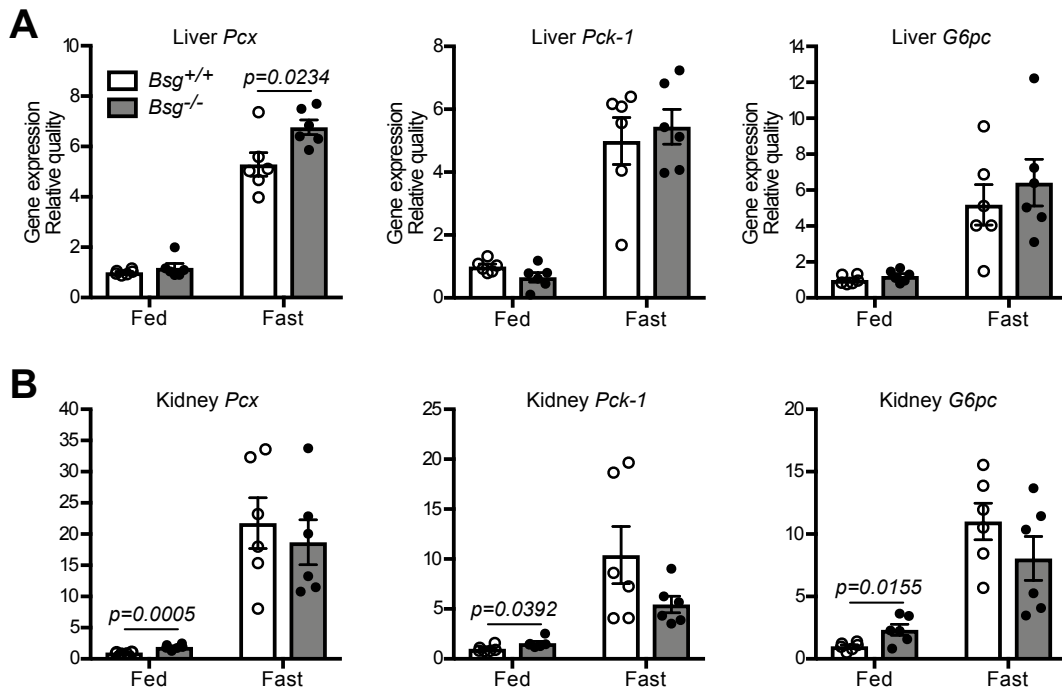

# Supplemental Figure 4

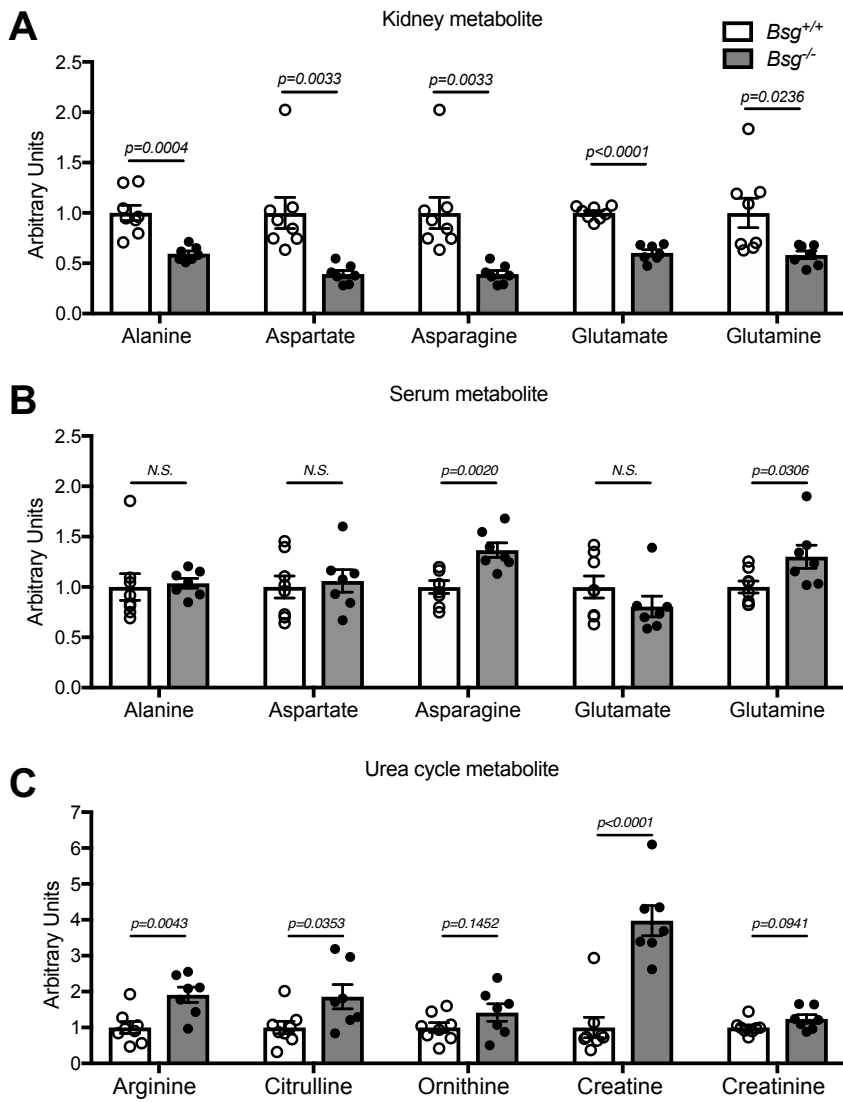

# Supplemental Figure 5

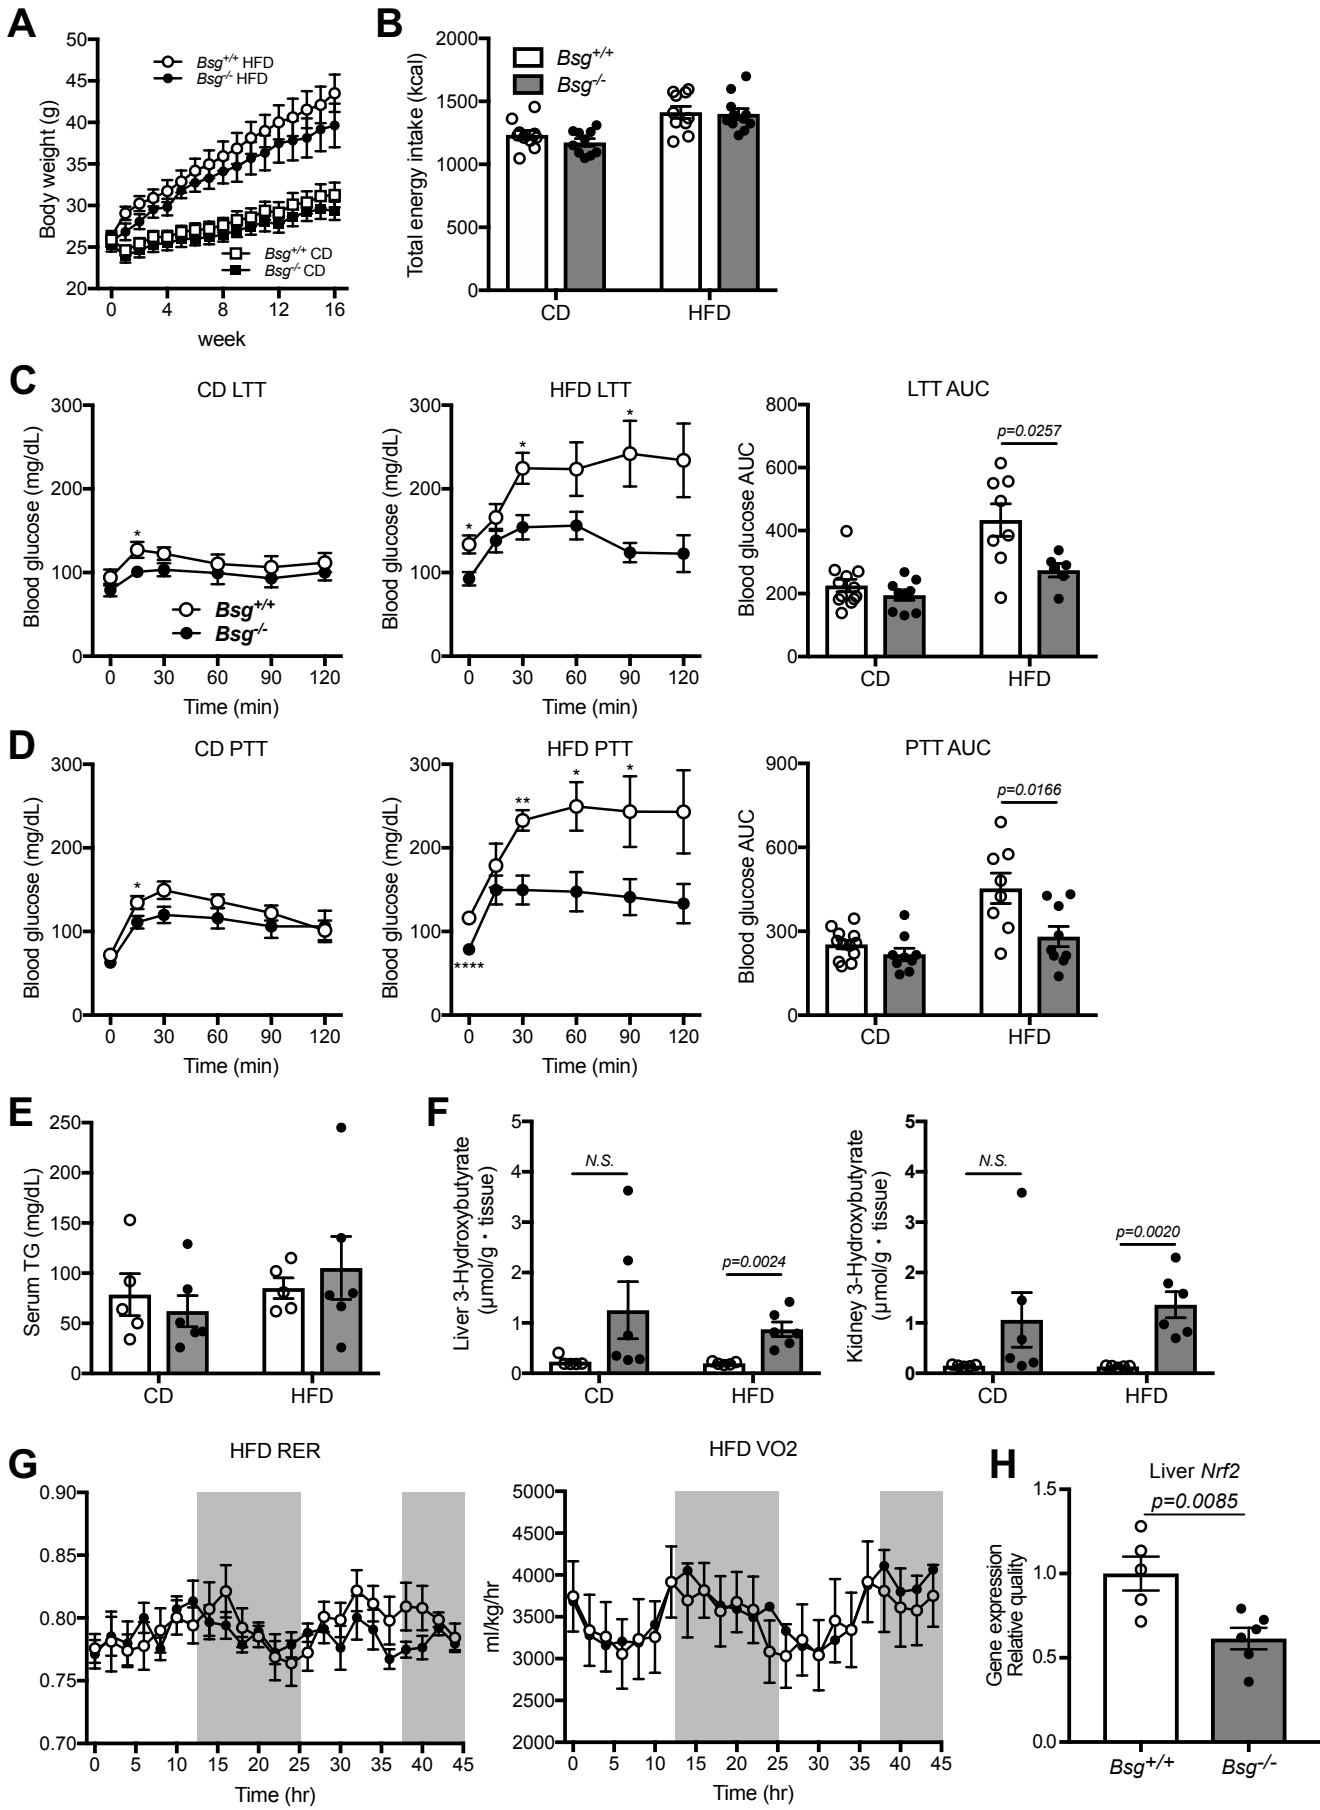

Supplement: jciinsight-6-142464-s056.pdf [file jciinsight-6-142464-s056.pdf]
